# Supplementary material for: Spiritual skepticism? Heterogeneous science skepticism in the Netherlands
Source: PubMed Central journal article supplement — Public Underst Sci. 2020 Mar 4;29(3):335–52. doi: 10.1177/0963662520908534 (PMC7323769; doi:10.1177/0963662520908534), 2020-03-04
Supplement: Spiritual_skepticism_supplemental_material.pdf [file Spiritual_skepticism_supplemental_material.pdf]

**Spiritual skepticism?**

**Heterogeneous science skepticism in the Netherlands**

Bastiaan T. Rutjens

*University of Amsterdam*

Romy van der Lee

*VU Amsterdam*

[Supplemental material: Correlation matrices](#)

## Correlation Matrix Study 1

|                  |             | morality | conservatism | orthodoxy | spirituality | faith in science | science literacy | climate | vaccination | GMO   | evolution |
|------------------|-------------|----------|--------------|-----------|--------------|------------------|------------------|---------|-------------|-------|-----------|
| morality         | Pearson's r | —        |              |           |              |                  |                  |         |             |       |           |
|                  | p-value     | —        |              |           |              |                  |                  |         |             |       |           |
| conservatism     | Pearson's r | 0.34     | —            |           |              |                  |                  |         |             |       |           |
|                  | p-value     | < .001   | —            |           |              |                  |                  |         |             |       |           |
| orthodoxy        | Pearson's r | 0.22     | 0.31         | —         |              |                  |                  |         |             |       |           |
|                  | p-value     | < .001   | < .001       | —         |              |                  |                  |         |             |       |           |
| spirituality     | Pearson's r | 0.11     | 0.09         | 0.15      | —            |                  |                  |         |             |       |           |
|                  | p-value     | 0.066    | 0.161        | 0.013     | —            |                  |                  |         |             |       |           |
| faith in science | Pearson's r | -0.20    | -0.12        | -0.19     | -0.40        | —                |                  |         |             |       |           |
|                  | p-value     | 0.001    | 0.051        | 0.002     | < .001       | —                |                  |         |             |       |           |
| science literacy | Pearson's r | -0.26    | -0.12        | -0.08     | -0.10        | 0.15             | —                |         |             |       |           |
|                  | p-value     | < .001   | 0.050        | 0.222     | 0.101        | 0.012            | —                |         |             |       |           |
| climate          | Pearson's r | 0.11     | 0.24         | 0.20      | 0.10         | -0.24            | -0.07            | —       |             |       |           |
|                  | p-value     | 0.082    | < .001       | < .001    | 0.109        | < .001           | 0.277            | —       |             |       |           |
| vaccination      | Pearson's r | 0.23     | 0.21         | 0.23      | 0.32         | -0.33            | -0.15            | 0.24    | —           |       |           |
|                  | p-value     | < .001   | < .001       | < .001    | < .001       | < .001           | 0.012            | < .001  | —           |       |           |
| GMO              | Pearson's r | 0.23     | 0.18         | 0.11      | 0.28         | -0.32            | -0.26            | 0.21    | 0.37        | —     |           |
|                  | p-value     | < .001   | 0.004        | 0.062     | < .001       | < .001           | < .001           | < .001  | < .001      | —     |           |
| evolution        | Pearson's r | 0.22     | 0.32         | 0.41      | 0.22         | -0.38            | -0.13            | 0.30    | 0.35        | 0.15  | —         |
|                  | p-value     | < .001   | < .001       | < .001    | < .001       | < .001           | 0.038            | < .001  | < .001      | 0.013 | —         |

## Correlation Matrix Study 2

|                  |             | morality | conservatism | orthodoxy | spirituality | faith in science | science literacy | climate | vaccination | GMO    | evolution |
|------------------|-------------|----------|--------------|-----------|--------------|------------------|------------------|---------|-------------|--------|-----------|
| morality         | Pearson's r | —        |              |           |              |                  |                  |         |             |        |           |
|                  | p-value     | —        |              |           |              |                  |                  |         |             |        |           |
| conservatism     | Pearson's r | 0.04     | —            |           |              |                  |                  |         |             |        |           |
|                  | p-value     | 0.515    | —            |           |              |                  |                  |         |             |        |           |
| orthodoxy        | Pearson's r | 0.07     | 0.26         | —         |              |                  |                  |         |             |        |           |
|                  | p-value     | 0.331    | < .001       | —         |              |                  |                  |         |             |        |           |
| spirituality     | Pearson's r | 0.03     | -0.09        | 0.37      | —            |                  |                  |         |             |        |           |
|                  | p-value     | 0.664    | 0.187        | < .001    | —            |                  |                  |         |             |        |           |
| faith in science | Pearson's r | -0.05    | -0.03        | -0.23     | -0.40        | —                |                  |         |             |        |           |
|                  | p-value     | 0.480    | 0.616        | < .001    | < .001       | —                |                  |         |             |        |           |
| science literacy | Pearson's r | -0.10    | -0.03        | -0.02     | -0.07        | 0.18             | —                |         |             |        |           |
|                  | p-value     | 0.144    | 0.687        | 0.746     | 0.285        | 0.007            | —                |         |             |        |           |
| climate          | Pearson's r | 0.04     | 0.24         | 0.21      | 0.09         | -0.29            | -0.08            | —       |             |        |           |
|                  | p-value     | 0.574    | < .001       | 0.002     | 0.204        | < .001           | 0.216            | —       |             |        |           |
| vaccination      | Pearson's r | 0.06     | -0.10        | 0.24      | 0.31         | -0.42            | -0.38            | 0.14    | —           |        |           |
|                  | p-value     | 0.358    | 0.128        | < .001    | < .001       | < .001           | < .001           | 0.046   | —           |        |           |
| GMO              | Pearson's r | 0.15     | -0.01        | 0.13      | 0.32         | -0.40            | -0.16            | 0.14    | 0.36        | —      |           |
|                  | p-value     | 0.031    | 0.884        | 0.052     | < .001       | < .001           | 0.016            | 0.040   | < .001      | —      |           |
| evolution        | Pearson's r | 0.12     | 0.16         | 0.36      | 0.24         | -0.35            | -0.08            | 0.43    | 0.21        | 0.32   | —         |
|                  | p-value     | 0.071    | 0.017        | < .001    | < .001       | < .001           | 0.238            | < .001  | 0.002       | < .001 | —         |
